# Supplementary material for: Role of mitochondrial DNA level in epidural-related maternal fever: a single-centre, observational, pilot study
Source: Springer Nature journal article supplement (doi:10.1186/s12884-024-06551-7), 2024-05-03

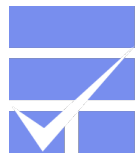

# CONSORT

TRANSPARENT REPORTING of TRIALS

## CONSORT 2010 Flow Diagram

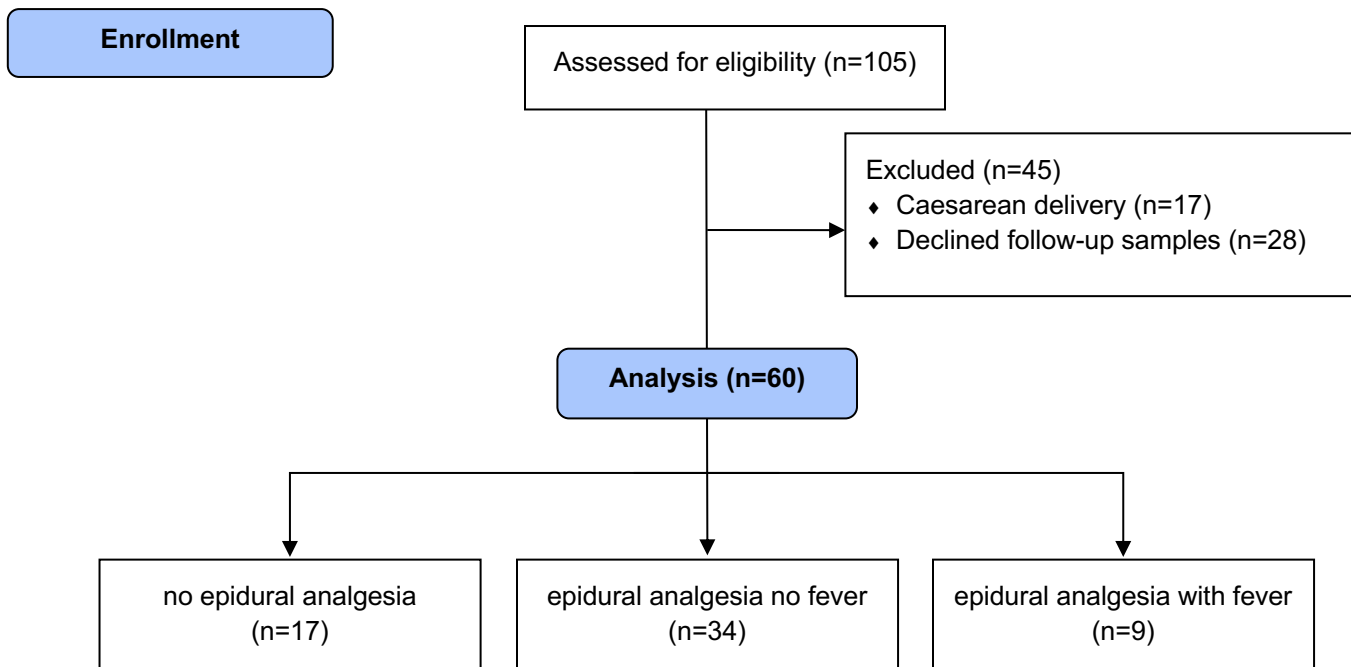

Supplement: MOESM1 [file 27049978]
